# Supplementary material for: Inter-Comparison of Diverse Heatwave Definitions in the Analysis of Spatiotemporally Contiguous Heatwave Events over China
Source: MDPI journal article supplement (doi:10.3390/rs14164082), 2022-08-20
Supplement: s1 [file s1]

**Supplementary Material for:**

**Inter-Comparison of Diverse Heatwave Definitions in the  
Analysis of Spatiotemporally Contiguous Heatwave Events over  
China**

Heyang Song<sup>1</sup>, Dongdong Kong<sup>1, 2, \*</sup>, Li Xiong<sup>1</sup>, Xihui Gu<sup>1, 2</sup>, Jianyu Liu<sup>3</sup>

Surnames or family names are underlined

1. Department of Atmospheric Science, School of Environmental Studies, China  
University of Geosciences, Wuhan 430074, China
2. Centre for severe weather and climate and hydro-geological hazards, 430074  
Wuhan, China
3. Laboratory of Critical Zone Evolution, School of Geography and Information  
Engineering, China University of Geosciences, Wuhan 430074, China

\* Correspondence: kongdongdong@cug.edu.cn

**Keywords:** spatiotemporally contiguous heatwaves; heatwave definitions; heat index

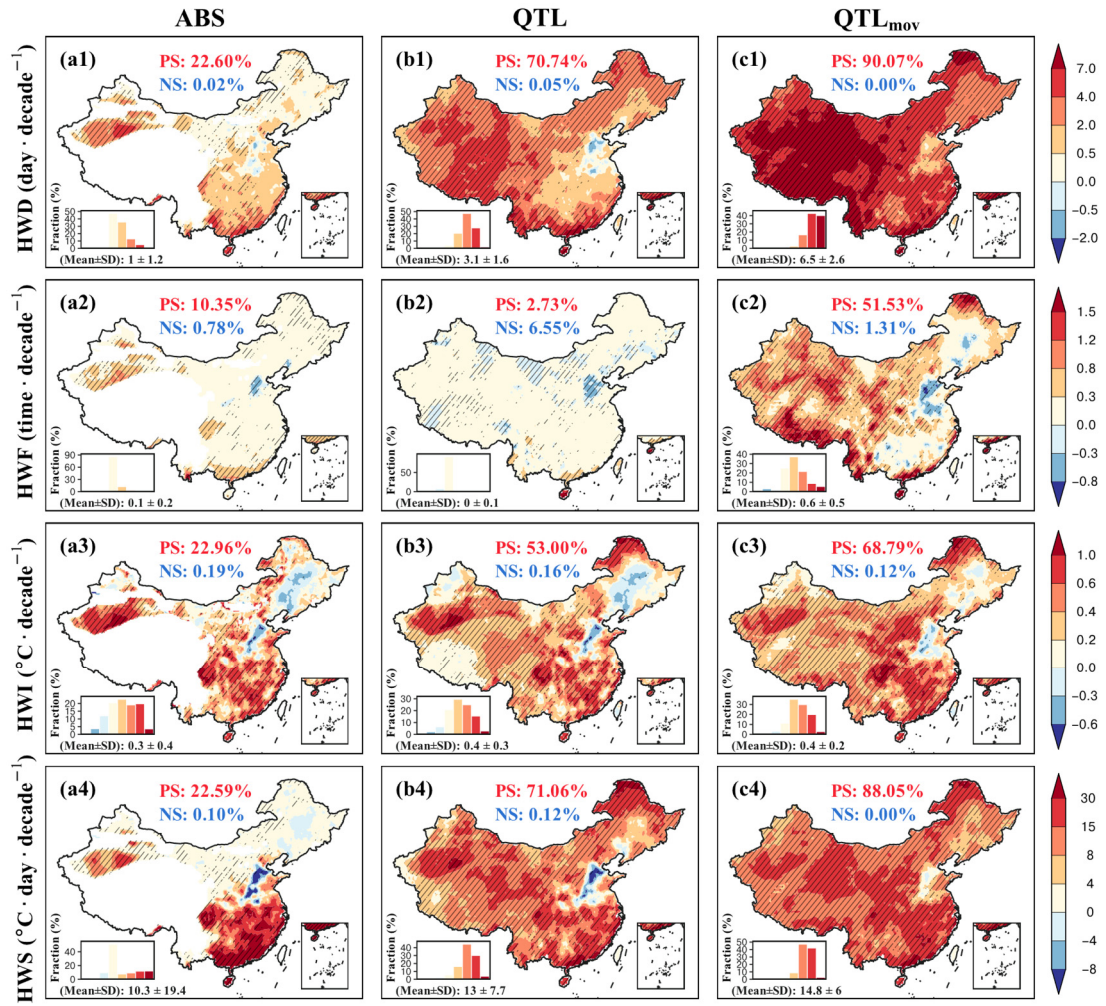

**Figure S1.** Same as Figure 3, but the *HI*-based, daytime, mild STHW results are used here.

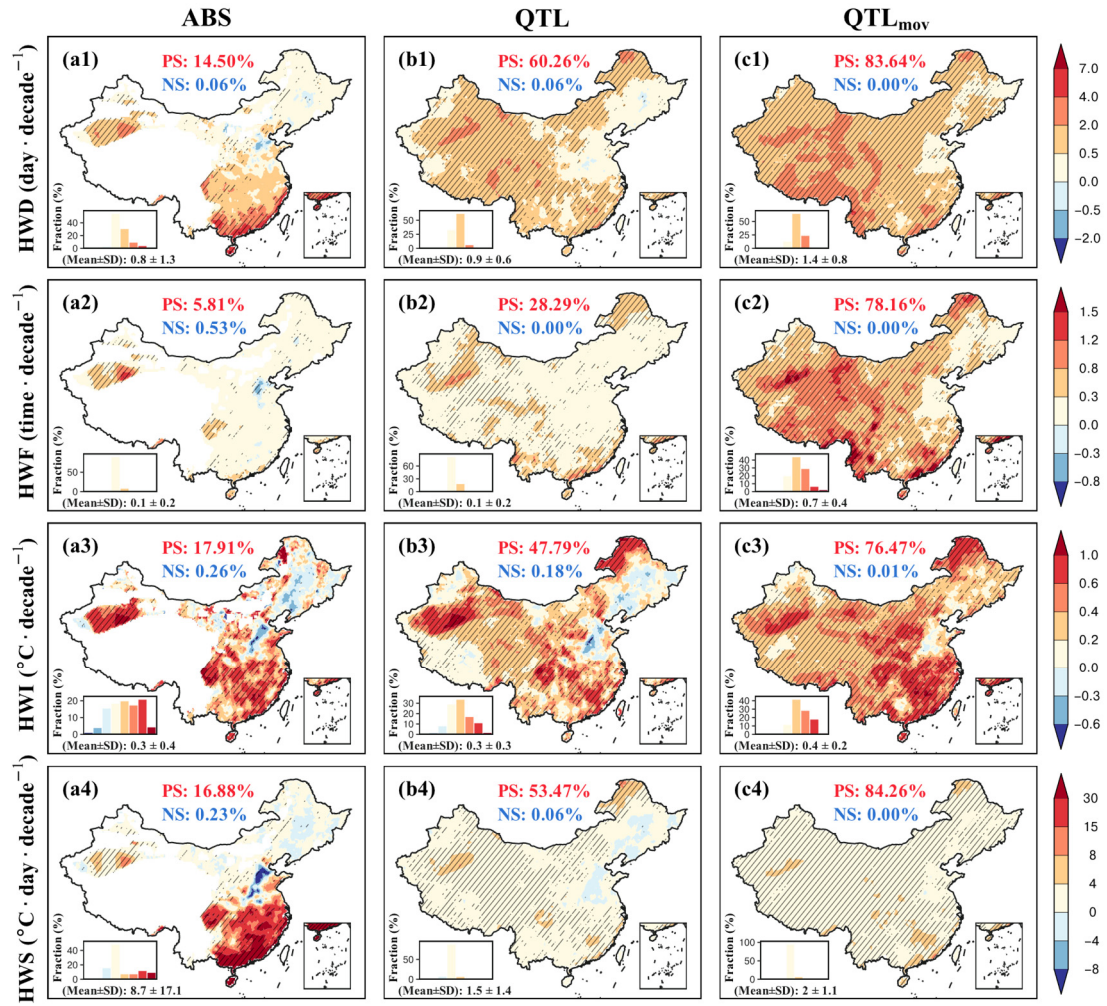

**Figure S2.** Same as Figure 3, but the *HI*-based, daytime, severe STHW results are used here.
